# Supplementary material for: Cost-efficient vaccination protocols for network epidemiology
Source: PubMed Central journal article supplement (PMC5608431; doi:10.1371/journal.pcbi.1005696), 2017-09-11

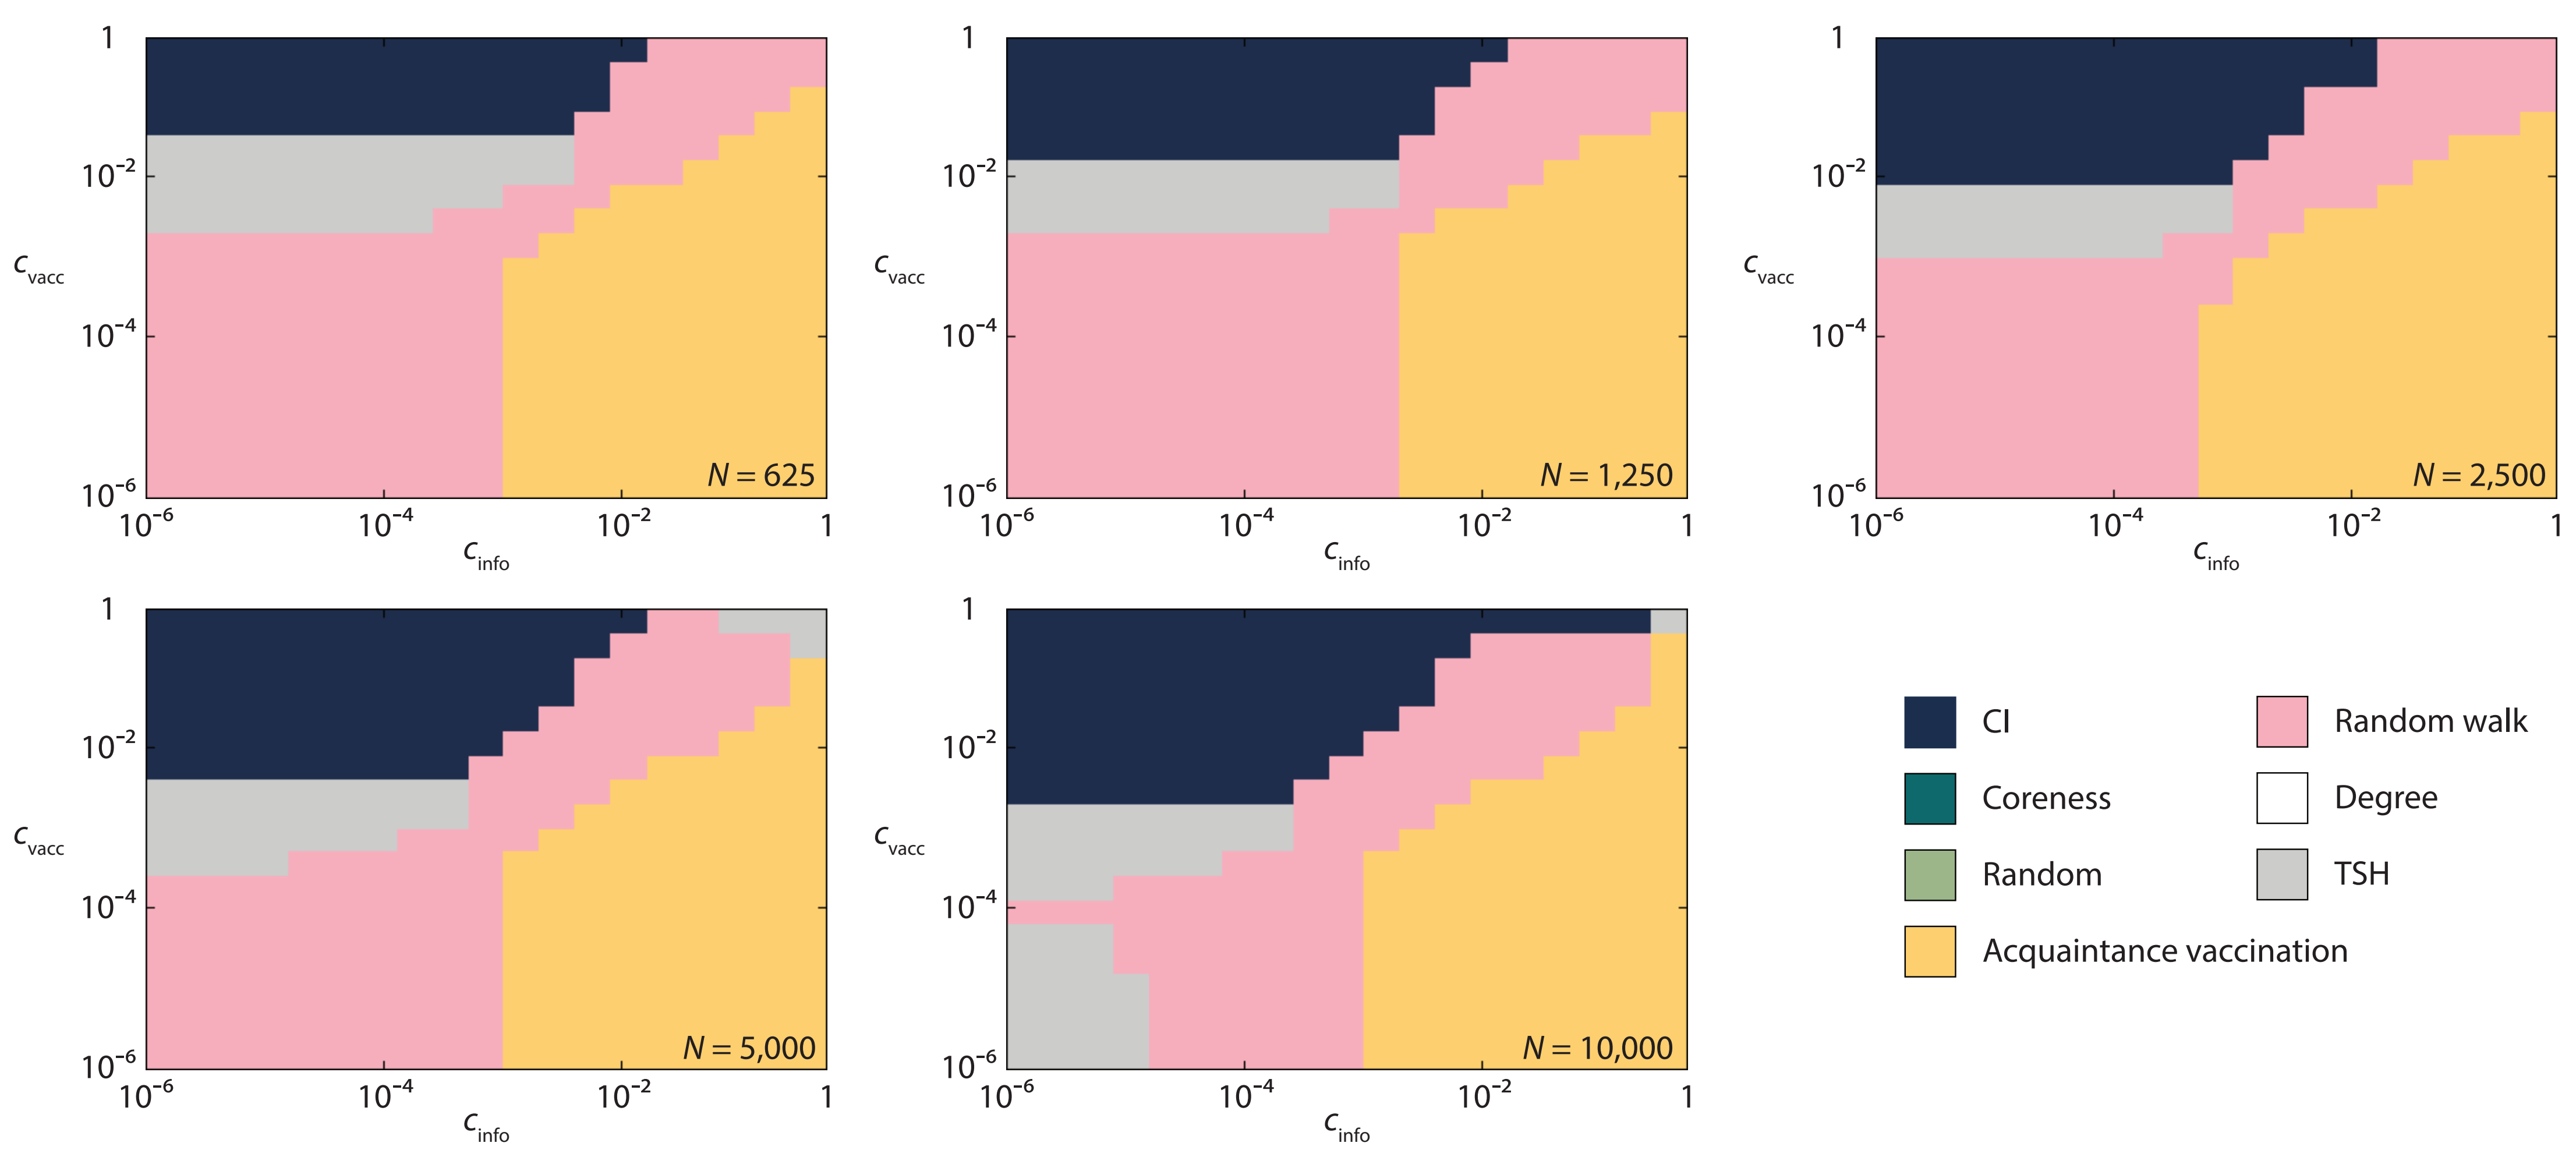

Supplement: pcbi.1005696.s006.pdf [file pcbi.1005696.s006.pdf]
